# Supplementary material
Source: PubMed Central journal article supplement (PMC5840025)
Supplement: NIHMS936282-supplement-1.pdf [file NIHMS936282-supplement-1.pdf]

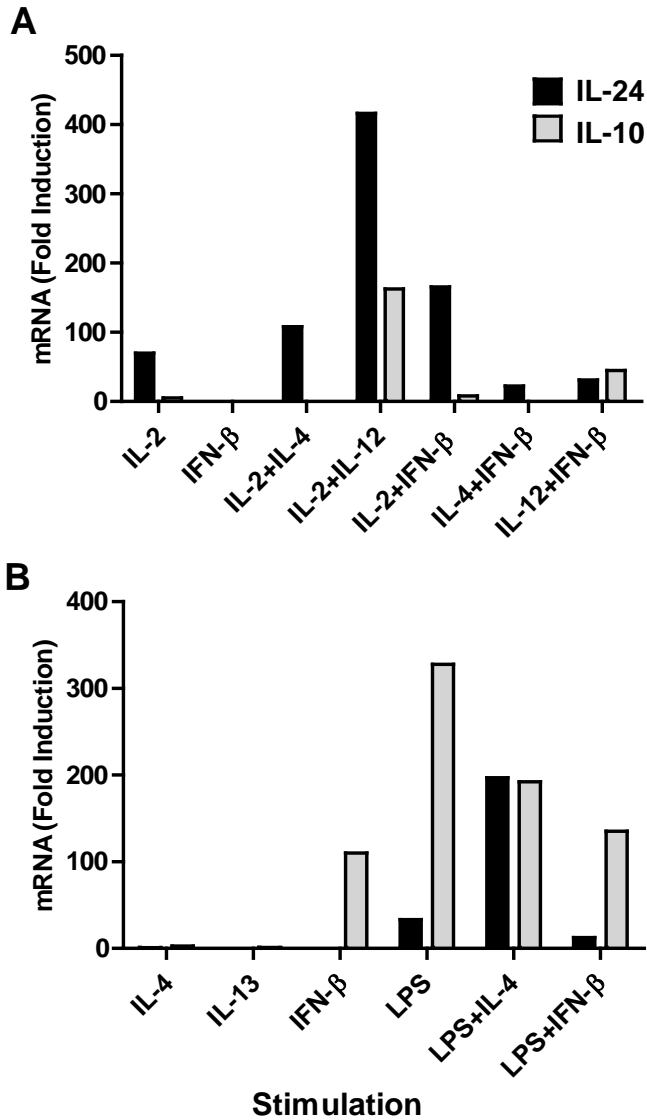

**Supplemental Figure 1.**

**Effects of type-I interferon on IL-24 and IL-10 expression in NK cells and BMM. (A)** NK cells and **(B)** BMM were stimulated under the indicated conditions for 6h or 3h respectively. IL-24 (black) and IL-10 (gray) mRNA expression was determined by RT-qPCR analysis (one of two representative experiments with 3-5 mice per group shown). Data are presented as the relative fold increase compared to non-stimulated cells (for each respective mouse strain) which were assigned a value of 1.
